# Supplementary material
Source: PubMed Central journal article supplement (PMC6309503)

A

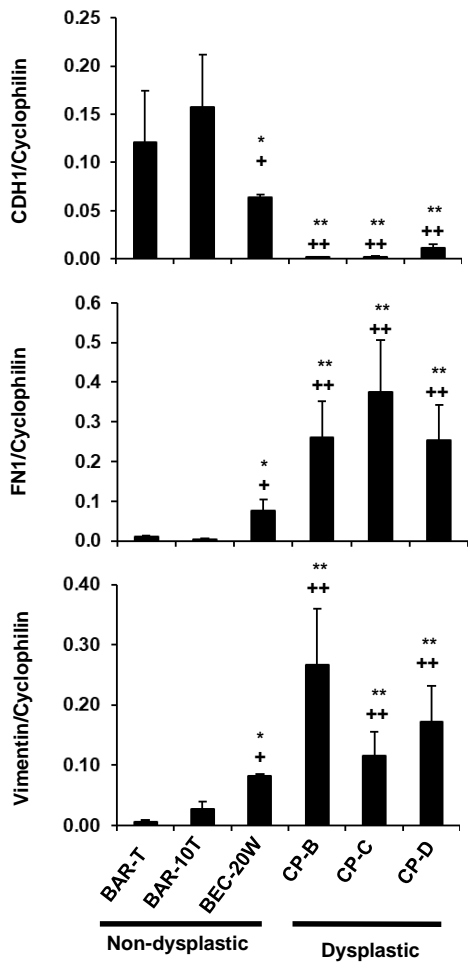

B

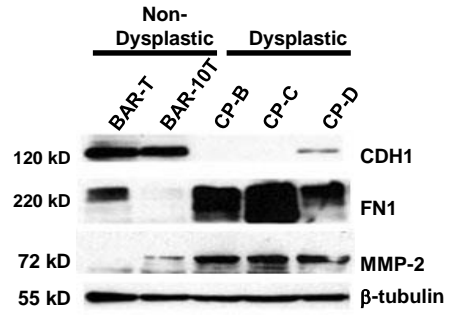

C

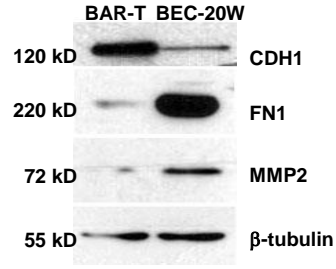

Supplement: NIHMS1508270-supplement-1.pdf [file NIHMS1508270-supplement-1.pdf]

A

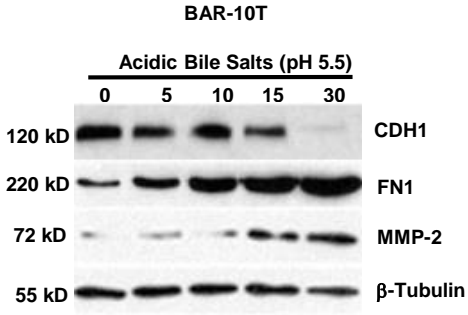

B

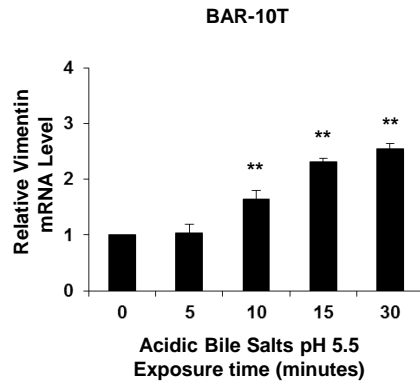

C

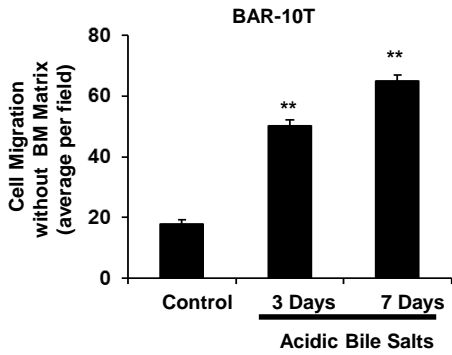

D

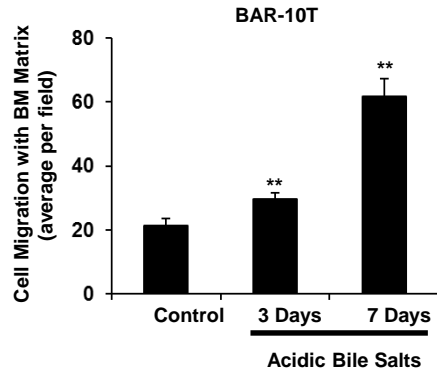

Supplement: NIHMS1508270-supplement-2.pdf [file NIHMS1508270-supplement-2.pdf]

A

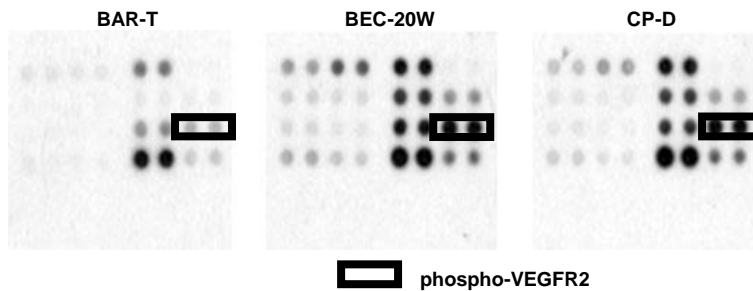

B

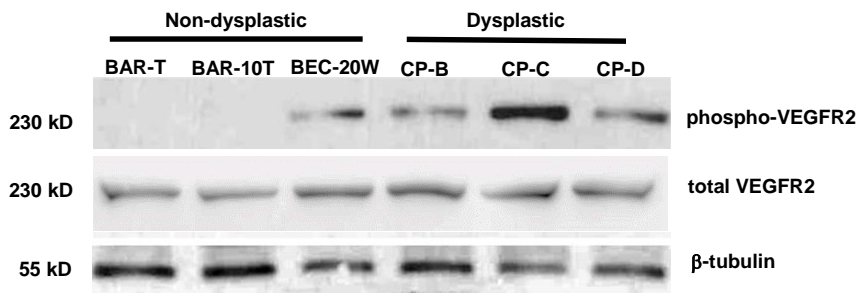

C

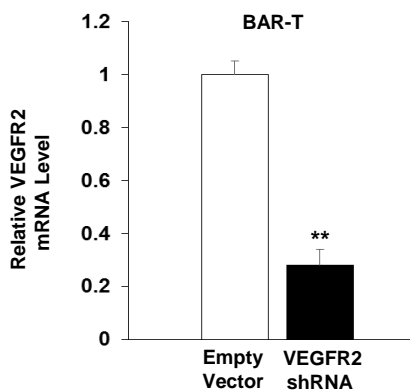

D

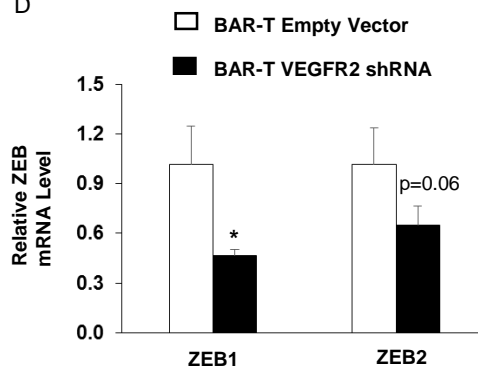

E

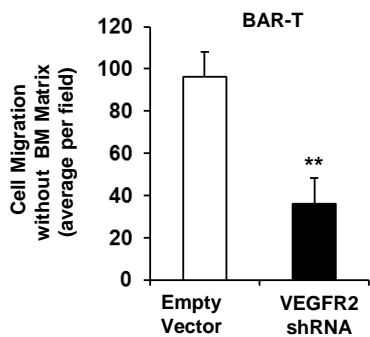

Supplement: NIHMS1508270-supplement-3.pdf [file NIHMS1508270-supplement-3.pdf]

A

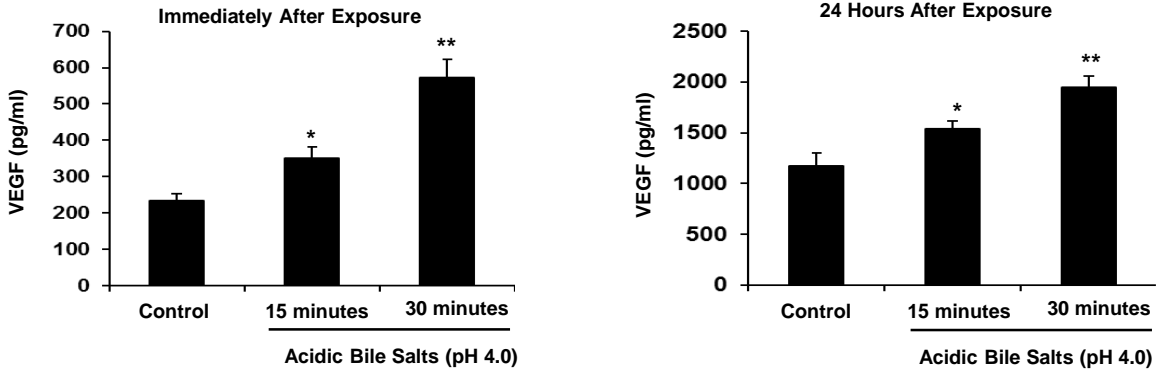

B

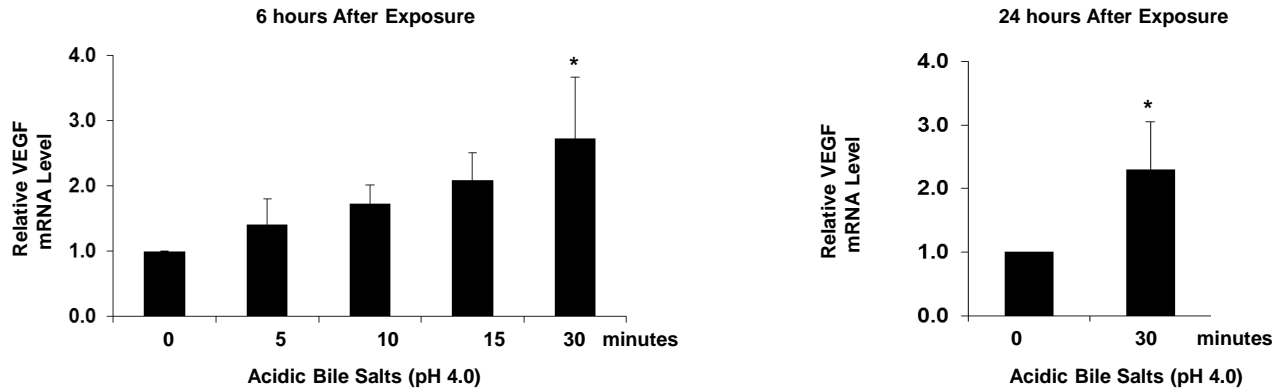

C

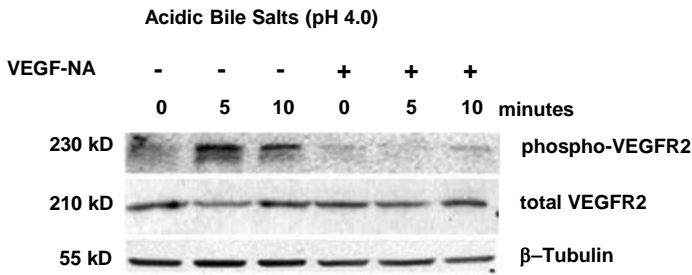

D

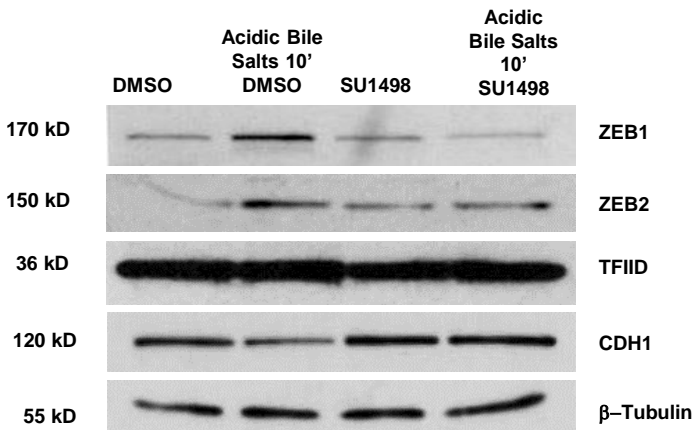

Supplement: NIHMS1508270-supplement-4.pdf [file NIHMS1508270-supplement-4.pdf]

A

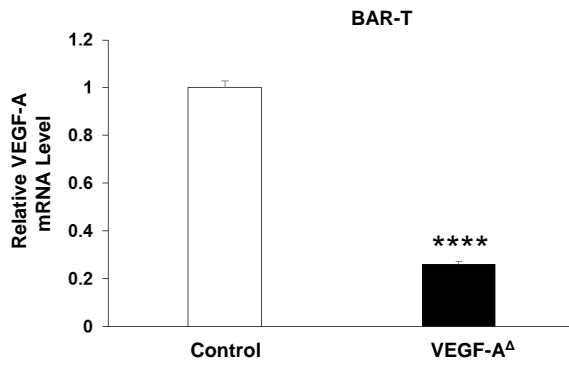

B

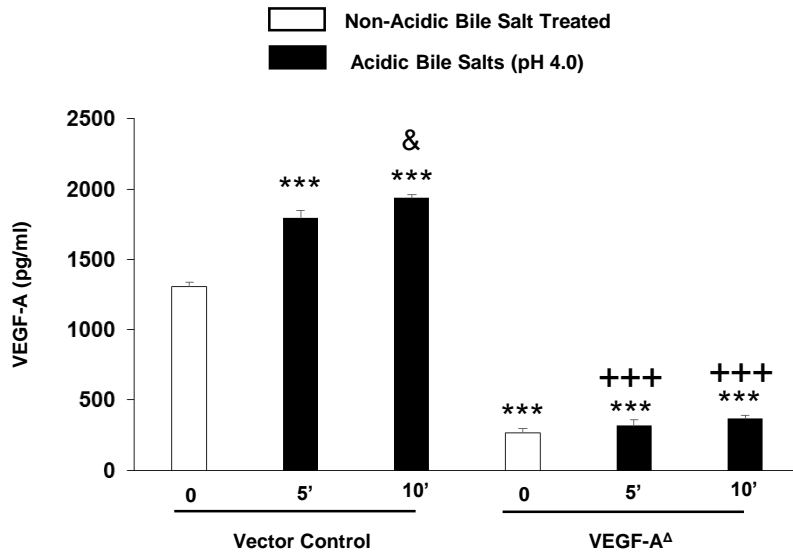

C

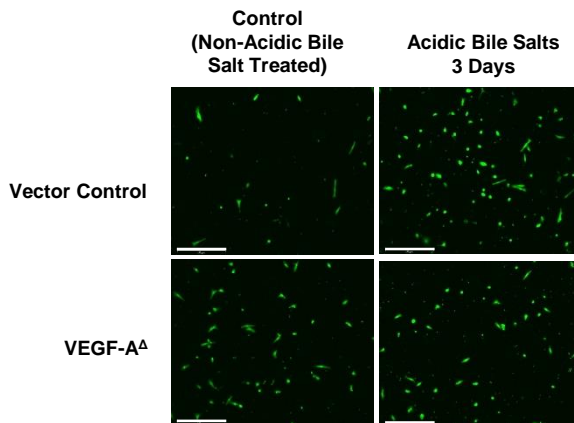

Supplement: NIHMS1508270-supplement-5.pdf [file NIHMS1508270-supplement-5.pdf]

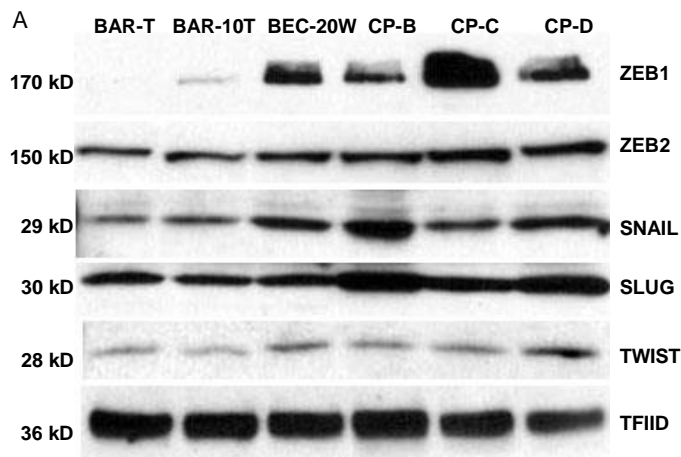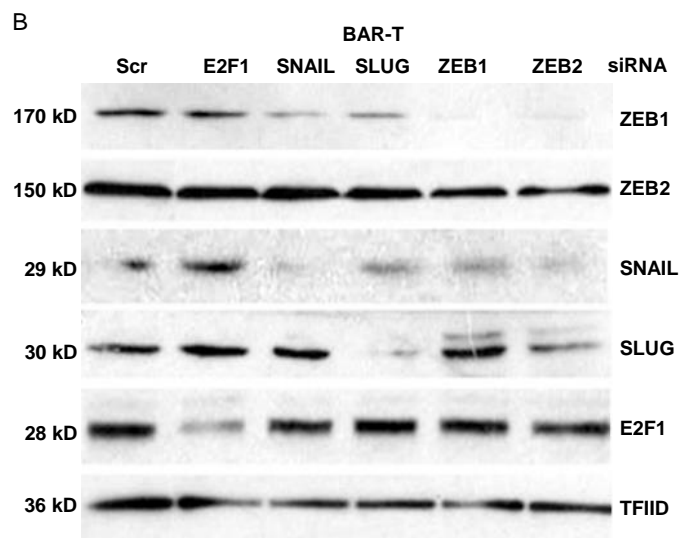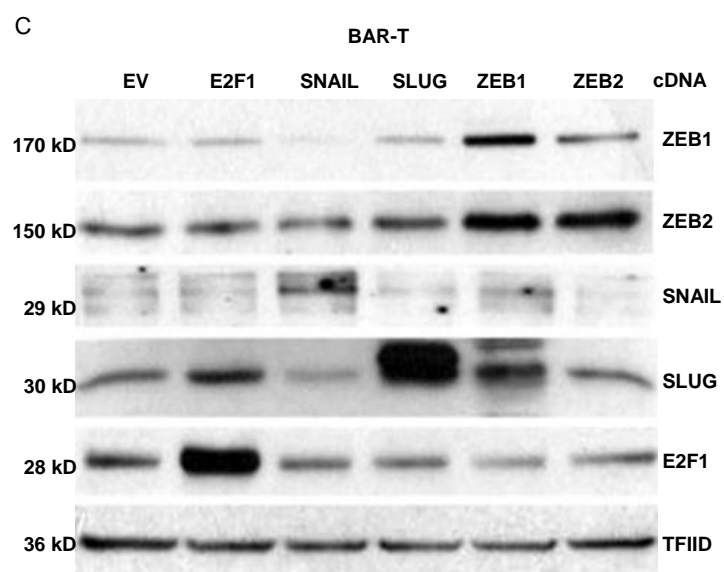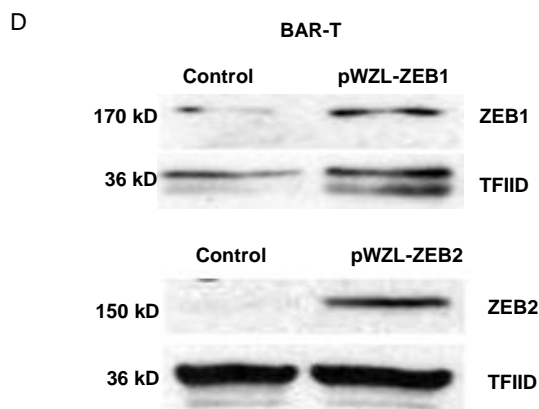

Supplement: NIHMS1508270-supplement-7.pdf [file NIHMS1508270-supplement-7.pdf]
